# Supplementary material for: Deep-Sequencing of the Peach Latent Mosaic Viroid Reveals New Aspects of Population Heterogeneity
Source: PubMed Central journal article supplement (PMC3907566; doi:10.1371/journal.pone.0087297), 2014-01-30
Supplement: pone.0087297.s001.pdf [file pone.0087297.s001.pdf]

---

| <b>P7 Library</b>            |                                  |                              |
|------------------------------|----------------------------------|------------------------------|
| <b>Number of occurrences</b> | <b>Number of different reads</b> | <b>Total number of reads</b> |
| <b>1</b>                     | 11816                            | 11816                        |
| <b>2</b>                     | 2105                             | 4210                         |
| <b>3</b>                     | 983                              | 2949                         |
| <b>4</b>                     | 575                              | 2300                         |
| <b>5</b>                     | 322                              | 1610                         |
| <b>6</b>                     | 283                              | 1698                         |
| <b>7</b>                     | 166                              | 1162                         |
| <b>8</b>                     | 154                              | 1232                         |
| <b>9</b>                     | 108                              | 972                          |
| <b>10</b>                    | 110                              | 1100                         |
| <b>11</b>                    | 87                               | 957                          |
| <b>12</b>                    | 69                               | 828                          |
| <b>13</b>                    | 49                               | 637                          |
| <b>14</b>                    | 49                               | 686                          |
| <b>15</b>                    | 42                               | 630                          |
| <b>16</b>                    | 51                               | 816                          |
| <b>17</b>                    | 28                               | 476                          |
| <b>18</b>                    | 35                               | 630                          |
| <b>19</b>                    | 20                               | 380                          |
| <b>20</b>                    | 20                               | 400                          |
| <b>21</b>                    | 21                               | 441                          |
| <b>22</b>                    | 22                               | 484                          |
| <b>23</b>                    | 23                               | 529                          |
| <b>24</b>                    | 17                               | 408                          |
| <b>25</b>                    | 19                               | 475                          |
| <b>26</b>                    | 16                               | 416                          |
| <b>27</b>                    | 17                               | 459                          |
| <b>28</b>                    | 10                               | 280                          |
| <b>29</b>                    | 6                                | 174                          |
| <b>30</b>                    | 14                               | 420                          |
| <b>31</b>                    | 11                               | 341                          |
| <b>32</b>                    | 10                               | 320                          |
| <b>33</b>                    | 8                                | 264                          |
| <b>34</b>                    | 12                               | 408                          |
| <b>35</b>                    | 11                               | 385                          |
| <b>36</b>                    | 14                               | 504                          |
| <b>37</b>                    | 8                                | 296                          |
| <b>38</b>                    | 4                                | 152                          |
| <b>39</b>                    | 6                                | 234                          |
| <b>40</b>                    | 6                                | 240                          |

---

---

|    |    |     |
|----|----|-----|
| 41 | 3  | 123 |
| 42 | 10 | 420 |
| 43 | 7  | 301 |
| 44 | 4  | 176 |
| 45 | 8  | 360 |
| 46 | 4  | 184 |
| 47 | 2  | 94  |
| 48 | 6  | 288 |
| 49 | 2  | 98  |
| 50 | 7  | 350 |
| 51 | 4  | 204 |
| 52 | 7  | 364 |
| 53 | 4  | 212 |
| 54 | 1  | 54  |
| 55 | 6  | 330 |
| 56 | 1  | 56  |
| 57 | 1  | 57  |
| 58 | 2  | 116 |
| 59 | 2  | 118 |
| 60 | 4  | 240 |
| 61 | 5  | 305 |
| 62 | 2  | 124 |
| 63 | 8  | 504 |
| 64 | 3  | 192 |
| 65 | 2  | 130 |
| 66 | 3  | 198 |
| 67 | 3  | 201 |
| 68 | 3  | 204 |
| 69 | 1  | 69  |
| 70 | 1  | 70  |
| 71 | 3  | 213 |
| 72 | 1  | 72  |
| 73 | 1  | 73  |
| 74 | 2  | 148 |
| 75 | 1  | 75  |
| 76 | 2  | 152 |
| 77 | 2  | 154 |
| 78 | 3  | 234 |
| 79 | 1  | 79  |
| 80 | 1  | 80  |
| 81 | 1  | 81  |
| 82 | 2  | 164 |
| 83 | 1  | 83  |

---

---

|            |   |     |
|------------|---|-----|
| <b>84</b>  | 2 | 168 |
| <b>85</b>  | 1 | 85  |
| <b>87</b>  | 1 | 87  |
| <b>90</b>  | 1 | 90  |
| <b>91</b>  | 3 | 273 |
| <b>92</b>  | 1 | 92  |
| <b>94</b>  | 1 | 94  |
| <b>96</b>  | 1 | 96  |
| <b>97</b>  | 1 | 97  |
| <b>98</b>  | 1 | 98  |
| <b>99</b>  | 3 | 297 |
| <b>101</b> | 3 | 303 |
| <b>102</b> | 1 | 102 |
| <b>104</b> | 2 | 208 |
| <b>105</b> | 1 | 105 |
| <b>107</b> | 2 | 214 |
| <b>108</b> | 1 | 108 |
| <b>110</b> | 1 | 110 |
| <b>112</b> | 1 | 112 |
| <b>113</b> | 2 | 226 |
| <b>114</b> | 1 | 114 |
| <b>115</b> | 1 | 115 |
| <b>118</b> | 2 | 236 |
| <b>119</b> | 1 | 119 |
| <b>121</b> | 2 | 242 |
| <b>122</b> | 1 | 122 |
| <b>123</b> | 1 | 123 |
| <b>125</b> | 1 | 125 |
| <b>127</b> | 1 | 127 |
| <b>133</b> | 3 | 399 |
| <b>134</b> | 2 | 268 |
| <b>136</b> | 1 | 136 |
| <b>137</b> | 1 | 137 |
| <b>138</b> | 1 | 138 |
| <b>139</b> | 3 | 417 |
| <b>140</b> | 2 | 280 |
| <b>141</b> | 1 | 141 |
| <b>143</b> | 1 | 143 |
| <b>147</b> | 1 | 147 |
| <b>148</b> | 1 | 148 |
| <b>151</b> | 1 | 151 |
| <b>152</b> | 1 | 152 |
| <b>154</b> | 2 | 308 |

---

---

|            |   |     |
|------------|---|-----|
| <b>156</b> | 1 | 156 |
| <b>158</b> | 1 | 158 |
| <b>159</b> | 1 | 159 |
| <b>161</b> | 1 | 161 |
| <b>162</b> | 1 | 162 |
| <b>165</b> | 1 | 165 |
| <b>166</b> | 1 | 166 |
| <b>167</b> | 1 | 167 |
| <b>170</b> | 1 | 170 |
| <b>173</b> | 1 | 173 |
| <b>174</b> | 1 | 174 |
| <b>178</b> | 1 | 178 |
| <b>180</b> | 2 | 360 |
| <b>184</b> | 1 | 184 |
| <b>185</b> | 2 | 370 |
| <b>190</b> | 2 | 380 |
| <b>195</b> | 1 | 195 |
| <b>197</b> | 1 | 197 |
| <b>202</b> | 1 | 202 |
| <b>209</b> | 1 | 209 |
| <b>214</b> | 1 | 214 |
| <b>217</b> | 2 | 434 |
| <b>219</b> | 1 | 219 |
| <b>234</b> | 1 | 234 |
| <b>238</b> | 1 | 238 |
| <b>242</b> | 1 | 242 |
| <b>247</b> | 2 | 494 |
| <b>249</b> | 1 | 249 |
| <b>252</b> | 1 | 252 |
| <b>259</b> | 1 | 259 |
| <b>263</b> | 1 | 263 |
| <b>278</b> | 1 | 278 |
| <b>287</b> | 1 | 287 |
| <b>299</b> | 1 | 299 |
| <b>304</b> | 1 | 304 |
| <b>314</b> | 1 | 314 |
| <b>322</b> | 1 | 322 |
| <b>341</b> | 1 | 341 |
| <b>343</b> | 1 | 343 |
| <b>345</b> | 1 | 345 |
| <b>363</b> | 1 | 363 |
| <b>367</b> | 1 | 367 |
| <b>384</b> | 1 | 384 |

---

---

|             |   |      |
|-------------|---|------|
| <b>386</b>  | 1 | 386  |
| <b>392</b>  | 1 | 392  |
| <b>404</b>  | 1 | 404  |
| <b>408</b>  | 1 | 408  |
| <b>410</b>  | 2 | 820  |
| <b>424</b>  | 1 | 424  |
| <b>430</b>  | 1 | 430  |
| <b>435</b>  | 1 | 435  |
| <b>439</b>  | 1 | 439  |
| <b>443</b>  | 1 | 443  |
| <b>452</b>  | 1 | 452  |
| <b>462</b>  | 1 | 462  |
| <b>473</b>  | 1 | 473  |
| <b>520</b>  | 1 | 520  |
| <b>529</b>  | 1 | 529  |
| <b>555</b>  | 1 | 555  |
| <b>557</b>  | 1 | 557  |
| <b>569</b>  | 1 | 569  |
| <b>620</b>  | 1 | 620  |
| <b>648</b>  | 1 | 648  |
| <b>649</b>  | 1 | 649  |
| <b>687</b>  | 1 | 687  |
| <b>715</b>  | 1 | 715  |
| <b>883</b>  | 1 | 883  |
| <b>897</b>  | 1 | 897  |
| <b>927</b>  | 1 | 927  |
| <b>939</b>  | 1 | 939  |
| <b>1019</b> | 1 | 1019 |
| <b>1138</b> | 1 | 1138 |
| <b>1146</b> | 1 | 1146 |
| <b>1420</b> | 1 | 1420 |
| <b>1751</b> | 1 | 1751 |
| <b>1782</b> | 1 | 1782 |
| <b>1784</b> | 1 | 1784 |
| <b>1939</b> | 1 | 1939 |
| <b>2062</b> | 1 | 2062 |
| <b>2076</b> | 1 | 2076 |
| <b>2377</b> | 1 | 2377 |
| <b>2624</b> | 1 | 2624 |
| <b>2874</b> | 1 | 2874 |
| <b>2899</b> | 1 | 2899 |
| <b>4180</b> | 1 | 4180 |
| <b>4570</b> | 1 | 4570 |

---

---

|               |              |               |
|---------------|--------------|---------------|
| <b>5354</b>   | 1            | 5354          |
| <b>6374</b>   | 1            | 6374          |
| <b>11877</b>  | 1            | 11877         |
| <b>14848</b>  | 1            | 14848         |
| <b>TOTAL:</b> | <b>17622</b> | <b>158610</b> |

---

| <b>P3 Library</b>            |                                  |                              |
|------------------------------|----------------------------------|------------------------------|
| <b>Number of occurrences</b> | <b>Number of different reads</b> | <b>Total number of reads</b> |
| <b>1</b>                     | 9350                             | 9350                         |
| <b>2</b>                     | 1763                             | 3526                         |
| <b>3</b>                     | 845                              | 2535                         |
| <b>4</b>                     | 495                              | 1980                         |
| <b>5</b>                     | 313                              | 1565                         |
| <b>6</b>                     | 219                              | 1314                         |
| <b>7</b>                     | 161                              | 1127                         |
| <b>8</b>                     | 122                              | 976                          |
| <b>9</b>                     | 97                               | 873                          |
| <b>10</b>                    | 99                               | 990                          |
| <b>11</b>                    | 63                               | 693                          |
| <b>12</b>                    | 69                               | 828                          |
| <b>13</b>                    | 44                               | 572                          |
| <b>14</b>                    | 50                               | 700                          |
| <b>15</b>                    | 32                               | 480                          |
| <b>16</b>                    | 27                               | 432                          |
| <b>17</b>                    | 34                               | 578                          |
| <b>18</b>                    | 19                               | 342                          |
| <b>19</b>                    | 15                               | 285                          |
| <b>20</b>                    | 24                               | 480                          |
| <b>21</b>                    | 21                               | 441                          |
| <b>22</b>                    | 20                               | 440                          |
| <b>23</b>                    | 12                               | 276                          |
| <b>24</b>                    | 22                               | 528                          |
| <b>25</b>                    | 7                                | 175                          |
| <b>26</b>                    | 12                               | 312                          |
| <b>27</b>                    | 12                               | 324                          |
| <b>28</b>                    | 9                                | 252                          |
| <b>29</b>                    | 14                               | 406                          |
| <b>30</b>                    | 10                               | 300                          |
| <b>31</b>                    | 8                                | 248                          |
| <b>32</b>                    | 11                               | 352                          |
| <b>33</b>                    | 7                                | 231                          |
| <b>34</b>                    | 8                                | 272                          |
| <b>35</b>                    | 7                                | 245                          |
| <b>36</b>                    | 7                                | 252                          |
| <b>37</b>                    | 6                                | 222                          |
| <b>38</b>                    | 9                                | 342                          |
| <b>39</b>                    | 9                                | 351                          |
| <b>40</b>                    | 9                                | 360                          |

---

|           |   |     |
|-----------|---|-----|
| <b>41</b> | 6 | 246 |
| <b>42</b> | 7 | 294 |
| <b>43</b> | 5 | 215 |
| <b>44</b> | 5 | 220 |
| <b>45</b> | 4 | 180 |
| <b>46</b> | 7 | 322 |
| <b>47</b> | 5 | 235 |
| <b>48</b> | 6 | 288 |
| <b>49</b> | 3 | 147 |
| <b>50</b> | 5 | 250 |
| <b>51</b> | 4 | 204 |
| <b>52</b> | 6 | 312 |
| <b>53</b> | 1 | 53  |
| <b>54</b> | 3 | 162 |
| <b>55</b> | 2 | 110 |
| <b>56</b> | 2 | 112 |
| <b>57</b> | 5 | 285 |
| <b>58</b> | 4 | 232 |
| <b>59</b> | 3 | 177 |
| <b>60</b> | 4 | 240 |
| <b>61</b> | 2 | 122 |
| <b>62</b> | 8 | 496 |
| <b>63</b> | 2 | 126 |
| <b>64</b> | 4 | 256 |
| <b>65</b> | 2 | 130 |
| <b>66</b> | 2 | 132 |
| <b>67</b> | 6 | 402 |
| <b>68</b> | 3 | 204 |
| <b>69</b> | 4 | 276 |
| <b>70</b> | 5 | 350 |
| <b>71</b> | 2 | 142 |
| <b>72</b> | 1 | 72  |
| <b>74</b> | 5 | 370 |
| <b>75</b> | 2 | 150 |
| <b>76</b> | 2 | 152 |
| <b>77</b> | 4 | 308 |
| <b>78</b> | 5 | 390 |
| <b>79</b> | 2 | 158 |
| <b>81</b> | 2 | 162 |
| <b>82</b> | 2 | 164 |
| <b>83</b> | 1 | 83  |
| <b>85</b> | 2 | 170 |
| <b>86</b> | 2 | 172 |

---



---

|            |   |     |
|------------|---|-----|
| <b>88</b>  | 2 | 176 |
| <b>89</b>  | 1 | 89  |
| <b>90</b>  | 1 | 90  |
| <b>91</b>  | 2 | 182 |
| <b>92</b>  | 5 | 460 |
| <b>93</b>  | 1 | 93  |
| <b>95</b>  | 2 | 190 |
| <b>96</b>  | 1 | 96  |
| <b>97</b>  | 2 | 194 |
| <b>98</b>  | 3 | 294 |
| <b>100</b> | 1 | 100 |
| <b>101</b> | 1 | 101 |
| <b>102</b> | 1 | 102 |
| <b>103</b> | 4 | 412 |
| <b>104</b> | 3 | 312 |
| <b>105</b> | 2 | 210 |
| <b>106</b> | 2 | 212 |
| <b>108</b> | 2 | 216 |
| <b>110</b> | 2 | 220 |
| <b>114</b> | 1 | 114 |
| <b>116</b> | 1 | 116 |
| <b>117</b> | 2 | 234 |
| <b>118</b> | 2 | 236 |
| <b>119</b> | 1 | 119 |
| <b>120</b> | 1 | 120 |
| <b>124</b> | 1 | 124 |
| <b>126</b> | 1 | 126 |
| <b>127</b> | 2 | 254 |
| <b>129</b> | 2 | 258 |
| <b>132</b> | 1 | 132 |
| <b>135</b> | 2 | 270 |
| <b>137</b> | 1 | 137 |
| <b>138</b> | 1 | 138 |
| <b>140</b> | 1 | 140 |
| <b>143</b> | 1 | 143 |
| <b>146</b> | 1 | 146 |
| <b>151</b> | 1 | 151 |
| <b>158</b> | 1 | 158 |
| <b>162</b> | 3 | 486 |
| <b>167</b> | 1 | 167 |
| <b>168</b> | 1 | 168 |
| <b>172</b> | 1 | 172 |
| <b>176</b> | 1 | 176 |

---

---

|            |   |     |
|------------|---|-----|
| <b>192</b> | 1 | 192 |
| <b>193</b> | 1 | 193 |
| <b>194</b> | 1 | 194 |
| <b>196</b> | 1 | 196 |
| <b>204</b> | 1 | 204 |
| <b>205</b> | 1 | 205 |
| <b>214</b> | 1 | 214 |
| <b>217</b> | 1 | 217 |
| <b>220</b> | 1 | 220 |
| <b>223</b> | 1 | 223 |
| <b>241</b> | 1 | 241 |
| <b>244</b> | 1 | 244 |
| <b>246</b> | 1 | 246 |
| <b>249</b> | 1 | 249 |
| <b>254</b> | 1 | 254 |
| <b>259</b> | 1 | 259 |
| <b>263</b> | 1 | 263 |
| <b>273</b> | 1 | 273 |
| <b>278</b> | 1 | 278 |
| <b>281</b> | 1 | 281 |
| <b>292</b> | 1 | 292 |
| <b>328</b> | 1 | 328 |
| <b>347</b> | 1 | 347 |
| <b>349</b> | 1 | 349 |
| <b>355</b> | 1 | 355 |
| <b>362</b> | 1 | 362 |
| <b>374</b> | 1 | 374 |
| <b>407</b> | 1 | 407 |
| <b>427</b> | 1 | 427 |
| <b>445</b> | 1 | 445 |
| <b>446</b> | 1 | 446 |
| <b>465</b> | 1 | 465 |
| <b>467</b> | 1 | 467 |
| <b>468</b> | 1 | 468 |
| <b>490</b> | 1 | 490 |
| <b>519</b> | 1 | 519 |
| <b>524</b> | 1 | 524 |
| <b>652</b> | 1 | 652 |
| <b>681</b> | 1 | 681 |
| <b>719</b> | 1 | 719 |
| <b>725</b> | 1 | 725 |
| <b>767</b> | 1 | 767 |
| <b>772</b> | 1 | 772 |

---

---

|               |              |               |
|---------------|--------------|---------------|
| <b>794</b>    | <b>2</b>     | <b>1588</b>   |
| <b>826</b>    | <b>1</b>     | <b>826</b>    |
| <b>827</b>    | <b>1</b>     | <b>827</b>    |
| <b>872</b>    | <b>1</b>     | <b>872</b>    |
| <b>896</b>    | <b>1</b>     | <b>896</b>    |
| <b>945</b>    | <b>1</b>     | <b>945</b>    |
| <b>998</b>    | <b>1</b>     | <b>998</b>    |
| <b>1008</b>   | <b>1</b>     | <b>1008</b>   |
| <b>1205</b>   | <b>1</b>     | <b>1205</b>   |
| <b>1381</b>   | <b>1</b>     | <b>1381</b>   |
| <b>1473</b>   | <b>1</b>     | <b>1473</b>   |
| <b>1711</b>   | <b>1</b>     | <b>1711</b>   |
| <b>1790</b>   | <b>1</b>     | <b>1790</b>   |
| <b>1861</b>   | <b>1</b>     | <b>1861</b>   |
| <b>1959</b>   | <b>1</b>     | <b>1959</b>   |
| <b>2026</b>   | <b>1</b>     | <b>2026</b>   |
| <b>2162</b>   | <b>1</b>     | <b>2162</b>   |
| <b>2178</b>   | <b>1</b>     | <b>2178</b>   |
| <b>2402</b>   | <b>1</b>     | <b>2402</b>   |
| <b>2642</b>   | <b>1</b>     | <b>2642</b>   |
| <b>2945</b>   | <b>1</b>     | <b>2945</b>   |
| <b>7283</b>   | <b>1</b>     | <b>7283</b>   |
| <b>7327</b>   | <b>1</b>     | <b>7327</b>   |
| <b>8431</b>   | <b>1</b>     | <b>8431</b>   |
| <b>8628</b>   | <b>1</b>     | <b>8628</b>   |
| <b>17695</b>  | <b>1</b>     | <b>17695</b>  |
| <b>20483</b>  | <b>1</b>     | <b>20483</b>  |
| <b>TOTAL:</b> | <b>14358</b> | <b>172829</b> |

---
