# Supplementary material for: Deep-Sequencing of the Peach Latent Mosaic Viroid Reveals New Aspects of Population Heterogeneity
Source: PubMed Central journal article supplement (PMC3907566; doi:10.1371/journal.pone.0087297), 2014-01-30
Supplement: pone.0087297.s002.pdf [file pone.0087297.s002.pdf]

| <b>Number of mutations<br/>relative to the parental<br/>sequence</b> | <b>Total number<br/>of reads<br/>(P7 Library)</b> | <b>Total number<br/>of reads<br/>(P3 Library)</b> |
|----------------------------------------------------------------------|---------------------------------------------------|---------------------------------------------------|
| 1                                                                    | 0                                                 | 0                                                 |
| 2                                                                    | 0                                                 | 7 327                                             |
| 3                                                                    | 2 901                                             | 22 506                                            |
| 4                                                                    | 15 574                                            | 43 731                                            |
| 5                                                                    | 21 529                                            | 47 292                                            |
| 6                                                                    | 29 761                                            | 24 473                                            |
| 7                                                                    | 35 267                                            | 7 888                                             |
| 8                                                                    | 21 942                                            | 1 267                                             |
| 9                                                                    | 7 813                                             | 62                                                |
| 10                                                                   | 1 290                                             | 55                                                |
| 11                                                                   | 97                                                | 74                                                |
| 12                                                                   | 23                                                | 45                                                |
| 13                                                                   | 14                                                | 54                                                |
| 14                                                                   | 50                                                | 32                                                |
| 15                                                                   | 29                                                | 58                                                |
| 16                                                                   | 37                                                | 22                                                |
| 17                                                                   | 116                                               | 19                                                |
| 18                                                                   | 118                                               | 17                                                |
| 19                                                                   | 125                                               | 10                                                |
| 20                                                                   | 129                                               | 0                                                 |
| 21                                                                   | 73                                                | 0                                                 |
| 22                                                                   | 18                                                | 0                                                 |
| 23-35                                                                | 0                                                 | 0                                                 |
| 36                                                                   | 0                                                 | 9                                                 |
| 37                                                                   | 0                                                 | 10                                                |
| 38                                                                   | 0                                                 | 8                                                 |
| 39-45                                                                | 0                                                 | 0                                                 |
| 46                                                                   | 0                                                 | 10                                                |
| 47-49                                                                | 0                                                 | 0                                                 |
| 50                                                                   | 0                                                 | 52                                                |
| 51                                                                   | 0                                                 | 32                                                |
| <b>Total</b>                                                         | <b>136 906</b>                                    | <b>155 053</b>                                    |
