# Supplementary material for: Deep-Sequencing of the Peach Latent Mosaic Viroid Reveals New Aspects of Population Heterogeneity
Source: PubMed Central journal article supplement (PMC3907566; doi:10.1371/journal.pone.0087297), 2014-01-30
Supplement: pone.0087297.s003.pdf [file pone.0087297.s003.pdf]

### Cohesion and separation of P3 dataset

| <b>P3</b>      |                 |                 |                 |                 |                 |                 |                 |
|----------------|-----------------|-----------------|-----------------|-----------------|-----------------|-----------------|-----------------|
| Model/Clusters | OOO             | OOI             | II              | OIO             | OII             | IOO             | IOI             |
| ΔOOO           | <b>1.98E+46</b> | 6.72E+43        | 3.09E+43        | 4.26E+44        | 3.38E+36        | 2.28E+45        | 1.72E+45        |
| ΔOOI           | 5.33E+46        | <b>3.35E+48</b> | 5.75E+45        | 2.14E+45        | 1.57E+41        | 1.04E+47        | 1.90E+47        |
| ΔII            | 1.14E+43        | 5.70E+44        | <b>1.70E+45</b> | 1.04E+42        | 2.37E+43        | 2.39E+43        | 6.38E+44        |
| ΔOIO           | 3.66E+42        | 1.49E+44        | 2.34E+43        | <b>5.36E+45</b> | 3.23E+43        | 1.80E+45        | 2.42E+45        |
| ΔOII           | 2.07E+39        | 1.34E+41        | 5.62E+42        | 2.60E+46        | <b>8.65E+47</b> | 5.03E+45        | 1.63E+45        |
| ΔIOO           | 1.15E+43        | 4.64E+44        | 2.18E+44        | 2.10E+42        | 4.81E+43        | <b>1.97E+46</b> | 2.48E+45        |
| ΔIOI           | 4.26E+42        | 2.68E+44        | 1.23E+44        | 3.02E+41        | 7.94E+42        | 2.62E+44        | <b>1.38E+46</b> |

### Cohesion and separation of P7 dataset

| <b>P7</b>      |                 |                 |                 |                 |                 |                 |                 |
|----------------|-----------------|-----------------|-----------------|-----------------|-----------------|-----------------|-----------------|
| Model/Clusters | OO              | OIO             | OII             | IIO             | III             | IOO             | IOI             |
| ΔOO            | <b>1.70E+50</b> | 1.39E+49        | 8.98E+47        | 7.24E+47        | 2.85E+49        | 5.80E+47        | 1.84E+46        |
| ΔOIO           | 1.20E+51        | <b>7.40E+52</b> | 3.37E+51        | 3.76E+51        | 1.17E+51        | 3.83E+45        | 4.03E+44        |
| ΔOII           | 7.54E+49        | 1.03E+50        | <b>3.06E+51</b> | 5.71E+49        | 5.29E+49        | 1.21E+43        | 2.73E+44        |
| ΔIIO           | 5.19E+46        | 2.41E+48        | 2.02E+47        | <b>1.16E+51</b> | 9.09E+48        | 5.16E+43        | 7.44E+41        |
| ΔIII           | 2.79E+46        | 1.88E+48        | 9.15E+46        | 1.31E+47        | <b>2.05E+49</b> | 3.90E+44        | 1.01E+43        |
| ΔIOO           | 5.20E+49        | 1.46E+45        | 1.01E+44        | 9.23E+43        | 3.84E+49        | <b>2.09E+51</b> | 2.14E+50        |
| ΔIOI           | 1.51E+48        | 1.12E+42        | 5.15E+43        | 1.63E+42        | 9.05E+47        | 1.11E+49        | <b>1.19E+50</b> |
