# Supplementary material for: Deep-Sequencing of the Peach Latent Mosaic Viroid Reveals New Aspects of Population Heterogeneity
Source: PubMed Central journal article supplement (PMC3907566; doi:10.1371/journal.pone.0087297), 2014-01-30
Supplement: pone.0087297.s004.pdf [file pone.0087297.s004.pdf]

Parent seq GAUUCAAACCCGGUCCCCUCAGAGGUGACUCUGAGUGAAAGGUUCGUGCUUAGCACACU  
P7\_III\_189;66;2 GAUUCAAACCCGGUCCCCUCAGAGGUGACUCUGAGUGAAAGGUUCGUGCUUAGCACACU  
P7\_IIO\_14;1784; GAUUCAAACCCGGUCCCCUCAGAGGUGACUCUGAGUGAAAGGUUCGUGCUUAGCACACU  
P7\_IOI\_2;11877; GAUUCAAACCCGGUCCCCUCAGAGGUGACUCUGAGUGAAAGGUUCGUGCUUAGCACACU  
P7\_IOO\_6;4180;2 GAUUCAAACCCGGUCCCCUCAGAGGUGACUCUGAGUGAAAGGUUCGUGCUUAGCACACU  
P7\_OII\_4;5354;2 GAUUCAAACCCGGUCCCCUCAGAGGUGACUCUGAGUGAAAGGUUCGUGCUUAGCACACU  
P7\_OIO\_1;14848; GAUUCAAACCCGGUCCCCUCAGAGGUGACUCUGAGUGAAAGGUUCGUGCUUAGCACACU  
P7\_OO\_315;37;29 GAUUCAAACCCGGUCCCCUCAGAGGUGACUCUGAGUGAAAGGUUCGUGCUUAGCACACU  
\*\*\*\*\*

InsA288 ΔU290

Parent seq GACGAGUUCUGAAAUGGAACGAAACCUUUCUAACCCAUUAGUUUCGUCGCAUCCAGCG  
P7\_III\_189;66;2 GACGAGUUCUGAAAUGGAACGAAACCUUUCUAACCCAUUAGUUUCGUCGCAUCCAGCG  
P7\_IIO\_14;1784; GACGAGUUCUGAAAUGGAACGAAACCUUUCUAACCCAUUAGUUUCGUCGCAUCCAGCG  
P7\_IOI\_2;11877; GACGAGUUCUGAAAUGGAACGAAACCUUUCUAACCCAUUAGUUUCGUCGCAUCCAGCG  
P7\_IOO\_6;4180;2 GACGAGUUCUGAAAUGGAACGAAACCUUUCUAACCCAUUAGUUUCGUCGCAUCCAGCG  
P7\_OII\_4;5354;2 GACGAGUUCUGAAAUGGAACGAAACCUUUCUAACCCAUUAGUUUCGUCGCAUCCAGCG  
P7\_OIO\_1;14848; GACGAGUUCUGAAAUGGAACGAAACCUUUCUAACCCAUUAGUUUCGUCGCAUCCAGCG  
P7\_OO\_315;37;29 GACGAGUUCUGAAAUGGAACGAAACCUUUCUAACCCAUUAGUUUCGUCGCAUCCAGCG  
\*\*\*\*\*

C307U

Parent seq ACUCGUCAGUGGGCUAAGCCCAGACUUAUGAGAGAGUGGUUACCUCUCAGCCCCUCCACC  
P7\_III\_189;66;2 ACUCGUCAGUGGGCUAAGCCCAGACUUAUGAGAGAGUGGUUACCUCUCAGCCCCUCCACC  
P7\_IIO\_14;1784; ACUCGUCAGUGGGCUAAGCCCAGACUUAUGAGAGAGUGGUUACCUCUCAGCCCCUCCACC  
P7\_IOI\_2;11877; ACUCGUCAGUGGGCUAAGCCCAGACUUAUGAGAGAGUGGUUACCUCUCAGCCCCUCCACC  
P7\_IOO\_6;4180;2 ACUCGUCAGUGGGCUAAGCCCAGACUUAUGAGAGAGUGGUUACCUCUCAGCCCCUCCACC  
P7\_OII\_4;5354;2 ACUCGUCAGUGGGCUAAGCCCAGACUUAUGAGAGAGUGGUUACCUCUCAGCCCCUCCACC  
P7\_OIO\_1;14848; ACUCGUCAGUGGGCUAAGCCCAGACUUAUGAGAGAGUGGUUACCUCUCAGCCCCUCCACC  
P7\_OO\_315;37;29 ACUCGUCAGUGGGCUAAGCCCAGACUUAUGAGAGAGUGGUUACCUCUCAGCCCCUCCACC  
\*\*\*\*\*

G31A

Parent seq UUGGGGUGCCCUAUUCGGAGCACUGCAGUUUCGGAUAGAAAGGCUAAGCACUUCGCAAUG  
P7\_III\_189;66;2 UUGGGGUGCCCUAUUCGGAGCACUGCAGUUUCGGAUAGAAAGGCUAAGCACUUCGCAAUG  
P7\_IIO\_14;1784; UUGGGGUGCCCUAUUCGGAGCACUGCAGUUUCGGAUAGAAAGGCUAAGCACUUCGCAAUG  
P7\_IOI\_2;11877; UUGGGGUGCCCUAUUCGGAGCACUGCAGUUUCGGAUAGAAAGGCUAAGCACUUCGCAAUG  
P7\_IOO\_6;4180;2 UUGGGGUGCCCUAUUCGGAGCACUGCAGUUUCGGAUAGAAAGGCUAAGCACUUCGCAAUG  
P7\_OII\_4;5354;2 UUGGGGUGCCCUAUUCGGAGCACUGCAGUUUCGGAUAGAAAGGCUAAGCACUUCGCAAUG  
P7\_OIO\_1;14848; UUGGGGUGCCCUAUUCGGAGCACUGCAGUUUCGGAUAGAAAGGCUAAGCACUUCGCAAUG  
P7\_OO\_315;37;29 UUGGGGUGCCCUAUUCGGAGCACUGCAGUUUCGGAUAGAAAGGCUAAGCACUUCGCAAUG  
\*\*\*\*\*

ΔC117 C118U C138U

Parent seq AAGUAAGGUGGGACUUUCCCUAGGGUUUGAGCGGUCGAACCCAGGGGGAGUGUGAU  
P7\_III\_189;66;2 AAGUAAGGUGGGACUUUCCCUAGGGUUUGAGCGGUCGAACCCAGGGGGAGUGUGAU  
P7\_IIO\_14;1784; AAGUAAGGUGGGACUUUCCCUAGGGUUUGAGCGGUCGAACCCAGGGGGAGUGUGAU  
P7\_IOI\_2;11877; AAGUAAGGUGGGACUUUCCCUAGGGUUUGAGCGGUCGAACCCAGGGGGAGUGUGAU  
P7\_IOO\_6;4180;2 AAGUAAGGUGGGACUUUCCCUAGGGUUUGAGCGGUCGAACCCAGGGGGAGUGUGAU  
P7\_OII\_4;5354;2 AAGUAAGGUGGGACUUUCCCUAGGGUUUGAGCGGUCGAACCCAGGGGGAGUGUGAU  
P7\_OIO\_1;14848; AAGUAAGGUGGGACUUUCCCUAGGGUUUGAGCGGUCGAACCCAGGGGGAGUGUGAU  
P7\_OO\_315;37;29 AAGUAAGGUGGGACUUUCCCUAGGGUUUGAGCGGUCGAACCCAGGGGGAGUGUGAU  
\*\*\*\*\*

C148A G184A G201A
