# Supplementary material for: Deep-Sequencing of the Peach Latent Mosaic Viroid Reveals New Aspects of Population Heterogeneity
Source: PubMed Central journal article supplement (PMC3907566; doi:10.1371/journal.pone.0087297), 2014-01-30
Supplement: pone.0087297.s005.pdf [file pone.0087297.s005.pdf]

C138U C148A

Parent seq CACUJCGCAAUGAACGUAAGGUGGGACUUUUCUAGGGUUUGAGCGGUCGAACCCAGGGG
P3\_II\_349;34;29 CACUJCGCAAUGAACGUAAGGUGGGACUUUUCUAGGGUUUGAGCGGUCGAACCCAGGGG
P3\_IOI\_67;204;2 CACUJCGCAAUGAACGUAAGGUGGGACUUUUCUAGGGUUUGAGCGGUCGAACCCAGGGG
P3\_IOO\_83;140;2 CACUJCGCAAUGAACGUAAGGUGGGACUUUUCUAGGGUUUGAGCGGUCGAACCCAGGGG
P3\_OII\_5;7327;2 CACUJCGCAAUGAACGUAAGGUGGGACUUUUCUAGGGUUUGAGCGGUCGAACCCAGGGG
P3\_OIO\_39;467;2 CACUJCGCAAUGAACGUAAGGUGGGACUUUUCUAGGGUUUGAGCGGUCGAACCCAGGGG
P3\_OOI\_2;17695; CACUJCGCAAUGAACGUAAGGUGGGACUUUUCUAGGGUUUGAGCGGUCGAACCCAGGGG
P3\_OOO\_7;2945;2 CACUJCGCAAUGAACGUAAGGUGGGACUUUUCUAGGGUUUGAGCGGUCGAACCCAGGGG
\*\*\*\*\*

G245A

Parent seq GAGUGUGAUCCAGGUACCGCCGUAGAAACUGGAUUACGACGCCUACCCGGGAUUCAAACC
P3\_II\_349;34;29 GAGUGUGAUCCAGGUACCGCCGUAGAAACUGGAUUACGACGCCUACCCGGGAUUCAAACC
P3\_IOI\_67;204;2 GAGUGUGAUCCAGGUACCGCCGUAGAAACUGGAUUACGACGCCUACCCGGGAUUCAAACC
P3\_IOO\_83;140;2 GAGUGUGAUCCAGGUACCGCCGUAGAAACUGGAUUACGACGCCUACCCGGGAUUCAAACC
P3\_OII\_5;7327;2 GAGUGUGAUCCAGGUACCGCCGUAGAAACUGGAUUACGACGCCUACCCGGGAUUCAAACC
P3\_OIO\_39;467;2 GAGUGUGAUCCAGGUACCGCCGUAGAAACUGGAUUACGACGCCUACCCGGGAUUCAAACC
P3\_OOI\_2;17695; GAGUGUGAUCCAGGUACCGCCGUAGAAACUGGAUUACGACGCCUACCCGGGAUUCAAACC
P3\_OOO\_7;2945;2 GAGUGUGAUCCAGGUACCGCCGUAGAAACUGGAUUACGACGCCUACCCGGGAUUCAAACC
\*\*\*\*\*

C307U

Parent seq CGGUCCCCUCAGAGGUGACUCUGAGUGAAAAGGUCUGUGCUUAGCACACUGACGAGUJCC
P3\_II\_349;34;29 CGGUCCCCUCAGAGGUGACUCUGAGUGAAAAGGUCUGUGCUUAGCACACUGACGAGUJCC
P3\_IOI\_67;204;2 CGGUCCCCUCAGAGGUGACUCUGAGUGAAAAGGUCUGUGCUUAGCACACUGACGAGUJCC
P3\_IOO\_83;140;2 CGGUCCCCUCAGAGGUGACUCUGAGUGAAAAGGUCUGUGCUUAGCACACUGACGAGUJCC
P3\_OII\_5;7327;2 CGGUCCCCUCAGAGGUGACUCUGAGUGAAAAGGUCUGUGCUUAGCACACUGACGAGUJCC
P3\_OIO\_39;467;2 CGGUCCCCUCAGAGGUGACUCUGAGUGAAAAGGUCUGUGCUUAGCACACUGACGAGUJCC
P3\_OOI\_2;17695; CGGUCCCCUCAGAGGUGACUCUGAGUGAAAAGGUCUGUGCUUAGCACACUGACGAGUJCC
P3\_OOO\_7;2945;2 CGGUCCCCUCAGAGGUGACUCUGAGUGAAAAGGUCUGUGCUUAGCACACUGACGAGUJCC
\*\*\*\*\*

U336C

G31A

Parent seq UGAAAUGGAACGAAACCUUUUCUAAACCAUAAGUUUCGUCGCAUCCAGCGACUCGUCAGU
P3\_II\_349;34;29 UGAAAUGGAACGAAACCUUUUCUAAACCAUAAGUUUCGUCGCAUCCAGCGACUCGUCAGU
P3\_IOI\_67;204;2 UGAAAUGGAACGAAACCUUUUCUAAACCAUAAGUUUCGUCGCAUCCAGCGACUCGUCAGU
P3\_IOO\_83;140;2 UGAAAUGGAACGAAACCUUUUCUAAACCAUAAGUUUCGUCGCAUCCAGCGACUCGUCAGU
P3\_OII\_5;7327;2 UGAAAUGGAACGAAACCUUUUCUAAACCAUAAGUUUCGUCGCAUCCAGCGACUCGUCAGU
P3\_OIO\_39;467;2 UGAAAUGGAACGAAACCUUUUCUAAACCAUAAGUUUCGUCGCAUCCAGCGACUCGUCAGU
P3\_OOI\_2;17695; UGAAAUGGAACGAAACCUUUUCUAAACCAUAAGUUUCGUCGCAUCCAGCGACUCGUCAGU
P3\_OOO\_7;2945;2 UGAAAUGGAACGAAACCUUUUCUAAACCAUAAGUUUCGUCGCAUCCAGCGACUCGUCAGU
\*\*\*\*\*

InsC76

InsG84

Parent seq GGGCUAAGCCCAGACUUUAUGAGAGAGUGGUUACCUCUCA-GCCCCUCG-ACCUUGGG
P3\_II\_349;34;29 GGGCUAAGCCCAGACUUUAUGAGAGAGUGGUUACCUCUCA-GCCCCUCG-ACCUUGGG
P3\_IOI\_67;204;2 GGGCUAAGCCCAGACUUUAUGAGAGAGUGGUUACCUCUCA-GCCCCUCG-ACCUUGGG
P3\_IOO\_83;140;2 GGGCUAAGCCCAGACUUUAUGAGAGAGUGGUUACCUCUCA-GCCCCUCG-ACCUUGGG
P3\_OII\_5;7327;2 GGGCUAAGCCCAGACUUUAUGAGAGAGUGGUUACCUCUCA-GCCCCUCG-ACCUUGGG
P3\_OIO\_39;467;2 GGGCUAAGCCCAGACUUUAUGAGAGAGUGGUUACCUCUCA-GCCCCUCG-ACCUUGGG
P3\_OOI\_2;17695; GGGCUAAGCCCAGACUUUAUGAGAGAGUGGUUACCUCUCA-GCCCCUCG-ACCUUGGG
P3\_OOO\_7;2945;2 GGGCUAAGCCCAGACUUUAUGAGAGAGUGGUUACCUCUCA-GCCCCUCG-ACCUUGGG
\*\*\*\*\*
