# Supplementary material for: Deep-Sequencing of the Peach Latent Mosaic Viroid Reveals New Aspects of Population Heterogeneity
Source: PubMed Central journal article supplement (PMC3907566; doi:10.1371/journal.pone.0087297), 2014-01-30
Supplement: pone.0087297.s006.pdf [file pone.0087297.s006.pdf]

>Mutated core hammerhead

GAAAGGTTTACGTTTCCATTTCTAGGAACTCATCAGTGTGCTAAGCACGACCTTTCCCCTATAGTGAGTCGTATTA

>Parental PLMVd.282 (+) polarity

GAAAGGTTTCGTTCCATTTTCAGGAACTCGTCAGTGTGCTAAGCACGACCTTTCCCCTATAGTGAGTCGTATTA

>Parental PLMVd.282 (-) polarity

CATAAGTTTCGTCGCATCCCAGCGACTCGTCAGTGGGCTAAGCCCAGACTTATGCCCTATAGTGAGTCGTATTA

>FIT (+) polarity

GAAAGGTTTCGTTCCATTTTCAGGAACTCATCAGTGTGCTAAGCACGACCTTTCCCCTATAGTGAGTCGTATTA

>FIT (-) polarity

CATAAGTTTCGTCGCATCCCAGCGACTCATCAGTGGGCTAAGCCCAGACTTATGCCCTATAGTGAGTCGTATTA
